# Supplementary material for: Antioxidant, Tyrosinase, α-Glucosidase, and Elastase Enzyme Inhibition Activities of Optimized Unripe Ajwa Date Pulp (Phoenix dactylifera) Extracts by Response Surface Methodology
Source: MDPI journal article supplement (doi:10.3390/ijms24043396), 2023-02-08
Supplement: s1 [file s1]

## Supplementary data sheet

**Table S1: Independent process variables with experimental ranges and levels for heat reflux extraction of URADP.**

| Input variables       | Variable range and levels (coded) |                |            |    |      |     |            |
|-----------------------|-----------------------------------|----------------|------------|----|------|-----|------------|
|                       | unit                              | Code           | - $\alpha$ | -1 | 0    | +1  | + $\alpha$ |
| Ethanol concentration | %                                 | X <sub>1</sub> | 0          | 25 | 50   | 75  | 100        |
| Time                  | min                               | X <sub>2</sub> | 15         | 45 | 82.5 | 120 | 150        |
| Temperature           | °C                                | X <sub>3</sub> | 40         | 50 | 60   | 70  | 80         |

**Table S2: Pearson correlation of the TPC, TFC, antioxidants and various enzymes inhibition activities.**

|      | TPC    | TFC    | DPPH   | ABTS   | Tyr    | Glu   |
|------|--------|--------|--------|--------|--------|-------|
| TFC  | 0.943  |        |        |        |        |       |
|      | 0.001  |        |        |        |        |       |
| DPPH | -0.759 | -0.905 |        |        |        |       |
|      | 0.048  | 0.005  |        |        |        |       |
| ABTS | -0.488 | -0.615 | 0.752  |        |        |       |
|      | 0.266  | 0.142  | 0.051  |        |        |       |
| Tyr  | -0.709 | -0.837 | 0.815  | 0.734  |        |       |
|      | 0.075  | 0.019  | 0.025  | 0.060  |        |       |
| Glu  | -0.702 | -0.545 | 0.385  | 0.342  | 0.135  |       |
|      | 0.079  | 0.206  | 0.394  | 0.452  | 0.774  |       |
| Ela  | 0.096  | 0.321  | -0.485 | -0.717 | -0.455 | 0.062 |
|      | 0.839  | 0.483  | 0.270  | 0.070  | 0.304  | 0.895 |

*Cell Contents*

*Pearson correlation,*

*P-Value*
